# Supplementary material for: Microsyntenic Clusters Reveal Conservation of lncRNAs in Chordates Despite Absence of Sequence Conservation
Source: MDPI journal article supplement (doi:10.3390/biology8030061), 2019-08-24
Supplement: s1 [file s1]

**Table S1.** Putatively conserved lincRNAs between *Homo sapiens* and *Branchiostoma lanceolatum*. Analysis of the genes surrounding the lincRNA focusing on three genes (upstream2, upstream1 and lincRNA). Some lincRNAs can be adscribed to more than one hypothetically conserved microsyntenic clusters.

| Orthologous lincRNAs <sup>1</sup> | State of the cluster in human <sup>2</sup>      | Human orthologous lincRNA <sup>3</sup> |
|-----------------------------------|-------------------------------------------------|----------------------------------------|
| BL02382 Sc0000007 7 + linc        | Synteny conserved in the coding genes           | AC005258.2                             |
| BL57655 Sc0000007 114 + linc      | *Conserved microsynteny                         | LOC100505666                           |
| BL58800 Sc0000008 5 - linc        | One gene with the strand inverted               | LINC01124<br>AC007405.1                |
| BL62558 Sc0000008 145 - linc      | *Conserved microsynteny                         | TCONS_I2_00003921                      |
| BL42493 Sc0000014 4 + linc        | *Conserved microsynteny                         | TCONS_00016098                         |
| BL39635 Sc0000017 32 - linc       | Two genes with the strand inverted              | LOC101448202                           |
| BL76639 Sc0000022 35 + linc       | One gene with the strand inverted               | SULT1C2P1                              |
| BL81207 Sc0000033 4 - linc        | Synteny conserved in the coding genes           | TCONS_00019766                         |
| BL63533 Sc0000034 21 + linc       | *Conserved microsynteny but extra gene in human | LINC01877                              |
| BL79865 Sc0000034 22 - linc       | *Conserved microsynteny but extra gene in human | TCONS_00002678                         |
| BL42364 Sc0000034 23 - linc       | *Conserved microsynteny but extra gene in human | AC097717.1                             |
| BL34463 Sc0000054 53 - linc       | Correct order but strands inverted              | AL355338.2                             |
| BL56140 Sc0000081 24 - linc       | Synteny conserved in the coding genes           | AC012309.2                             |
| BL88002 Sc0000083 10 - linc       | *Conserved microsynteny                         | AC007298.2                             |
| BL70460 Sc0000095 4 + linc        | Two genes with the strand inverted              | TCONS_00018032                         |
| BL35238 Sc0000141 19 - linc       | One gene with the strand inverted               | TCONS_00025555                         |
| BL43288 Sc0000247 8 + linc        | Two genes with the strand inverted              | NM_001302493.1                         |
| BL83080 Sc0000266 1 - linc        | *Conserved microsynteny                         | AC115284.2                             |
| BL66360 Sc0000273 1 - linc        | *Conserved microsynteny                         | AC012354.3                             |
| BL89644 Sc0000273 2 - linc        | *Conserved microsynteny                         | LINC01833                              |
| BL26716 Sc0000273 3 - linc        | *Conserved microsynteny                         | SIX3-AS1                               |
| BL68659 Sc0000384 9 - linc        | *Conserved microsynteny                         | TCONS_00011917                         |

<sup>1</sup>GenID, Scaffold, virtual coordinates and strand separated by “|”. <sup>2</sup>Description of the synteny of the cluster status in human. <sup>3</sup>ID of the putative human orthologous lincRNA. \* indicates a perfect match in strand and order of the three core genes.

**Table S2.** Putatively conserved lincRNAs between *Homo sapiens* and *Branchiostoma lanceolatum*. Analysis of the genes surrounding the lincRNA focusing on three genes (lincRNA, downstream1 and downstream2). Some lincRNAs can be adscribed to more than one hypothetically conserved microsyntenic clusters.

| Orthologous lincRNAs <sup>1</sup> | State of the cluster in human <sup>2</sup>       | Human orthologous lincRNA <sup>3</sup> |
|-----------------------------------|--------------------------------------------------|----------------------------------------|
| BL48403 Sc00000000 10 - linc      | Syntenly conserved in the coding genes           | AC004160.1                             |
| BL91553 Sc00000000 32 + linc      | *Conserved microsyntenly                         | HOXB-AS1                               |
| BL83549 Sc00000000 42 - linc      | Syntenly conserved in the coding genes           | TCONS_00003443                         |
| BL49148 Sc00000004 180 + linc     | Two genes with the strand inverted               | HOXB-AS4                               |
| BL88007 Sc00000005 228 + linc     | *Conserved microsyntenly                         | TCONS_00016695                         |
| BL88764 Sc00000006 154 + linc     | Correct order but strands inverted               | AC009159.2                             |
| BL21777 Sc00000012 28 + linc      | *Conserved microsyntenly                         | TCONS_l2_00025400                      |
| BL43485 Sc00000012 77 + linc      | *Conserved microsyntenly but extra gene in human | KCNJ2-AS1                              |
| BL38852 Sc00000015 95 + linc      | Two genes with the strand inverted               | TCONS_00025331                         |
| BL23696 Sc00000017 69 + linc      | One gene with the strand inverted                | TCONS_00003896                         |
| BL78928 Sc00000022 40 - linc      | One gene with the strand inverted                | AC100825.1                             |
| BL61801 Sc00000024 6 + linc       | Two genes with the strand inverted               | Z98257.1                               |
| BL41653 Sc00000050 7 + linc       | Two genes with the strand inverted               | AC092364.1                             |
| BL64814 Sc00000066 36 - linc      | Syntenly conserved in the coding genes           | TCONS_00014852                         |
| BL70524 Sc00000080 28 + linc      | *Conserved microsyntenly                         | Z98880.1                               |
| BL84269 Sc00000083 14 + linc      | *Conserved microsyntenly                         | AC114812.2                             |
| BL66046 Sc00000083 15 - linc      | *Conserved microsyntenly                         | AC090001.1                             |
| BL62840 Sc00000091 33 + linc      | *Conserved microsyntenly                         | LINC02410                              |
| BL90962 Sc00000097 13 - linc      | Syntenly conserved in the coding genes           | AL158013.1                             |
| BL67055 Sc00000174 7 - linc       | Two genes with the strand inverted               | AC012254.3                             |
| BL33122 Sc00000193 3 - linc       | Syntenly conserved in the coding genes           | AC006398.1                             |
| BL49481 Sc00000194 3 - linc       | One gene with the strand inverted                | LINC00210                              |
| BL57370 Sc00000219 7 + linc       | *Conserved microsyntenly                         | AC092364.1                             |
| BL52347 Sc00000273 6 - linc       | Syntenly conserved in the coding genes           | LINC01438                              |
| BL52353 Sc00000273 7 - linc       | *Conserved microsyntenly                         | TCONS_00022526                         |
|                                   |                                                  | AC093702.1                             |

<sup>1</sup>GenID, Scaffold, virtual coordinates and strand separated by “|”. <sup>2</sup>Description of the syntenly of the cluster status in human. <sup>3</sup>ID of the putative human orthologous lincRNA. \* indicates a perfect match in strand and order of the three core genes.
